# Supplementary material for: Segmentation of biological multivariate time-series data
Source: PubMed Central journal article supplement (PMC5390911; doi:10.1038/srep08937), 2015-03-11
Supplement: srep08937-s1.pdf [file srep08937-s1.pdf]

## Supplementary information S1

### Segmentation of biological multivariate time-series data

Nooshin Omranian<sup>1,2</sup>, Bernd Mueller-Roeber<sup>1</sup>, Zoran Nikoloski<sup>2,\*</sup>

<sup>1</sup> Department of Molecular Biology, University of Potsdam, Karl-Liebknecht-Str. 24-25, Haus 20, 14476 Potsdam, Germany

<sup>2</sup> Systems Biology and Mathematical Modelling Group, Max Planck Institute for Molecular Plant Physiology, Am Muehlenberg 1, 14476 Potsdam, Germany

\* E-mail: nikoloski@mpimp-golm.mpg.de

### Synthetic data

In this section, we provide additional elaboration of the results from different approaches applied on the synthetic data, described in the main text in Omranian *et al.* (2013). The results are succinctly summarized in Table S1, and Figure S1 showing the comparison between the obtained segmentations. The actual breakpoints are 7, 12, and 21.

### Yeast's metabolic cycle

In this section, we provide additional elaboration of the results from different approaches applied on the yeast's metabolic cycle (YMC) data, described in the main text. The results are succinctly summarized in Table S2, showing the comparison between the obtained segmentations.

### Yeast's cell cycle

In this section, we provide additional elaboration of the results from different approaches applied on the yeast's cell cycle (YCC) data. With the filtering step, the number of genes was reduced from 6076 to 2071. The characteristics of the resulting segmentations are summarized in Table S3 and Figure S3. Based on the work done by Spellman *et al.* (1998), the data should be segmented into 5 segments representing 5 cycles for which each cycle includes the following phases: M/G1, G1, S, G2, and M. Each of the M/G1, G1 and S phases lasts 2 time points while the G2 phase lasts only one time point, as described in Ramakrishnan *et al.* (2010). Therefore, as shown in Table S3, our method revealed the cell cycles in the YCC data.

### Oxidative stress and yeast's cell cycle

In this section, we provide additional elaboration of the results from the different approaches applied on the data capturing the effect of oxidative stress, induced by hydrogen peroxide (HP), on the yeast's cell cycle. With the filtering step, the number of genes was reduced from 4771 to 1189.

The characteristics of the resulting segmentations are summarized in Table S4 and Figure S4. Based on the work done by Shapira *et al.* (2004), we could capture all phases in the system which correspond to the G1, S, G2, G2/M phases of the cell cycle.

## Figure Legends

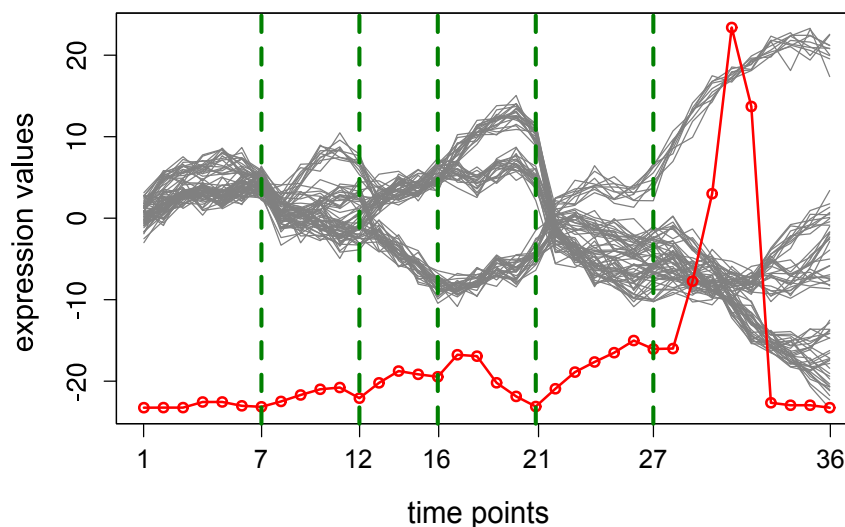

**Figure S1. Segmentation over synthetic data from Omranian *et al.* (2013).** The green dashed lines show the obtained breakpoints. The red dots, connected by a red line, represent the sequence  $A$  (column-averages of the absolute values of the regression coefficients in the matrix  $C$ ).

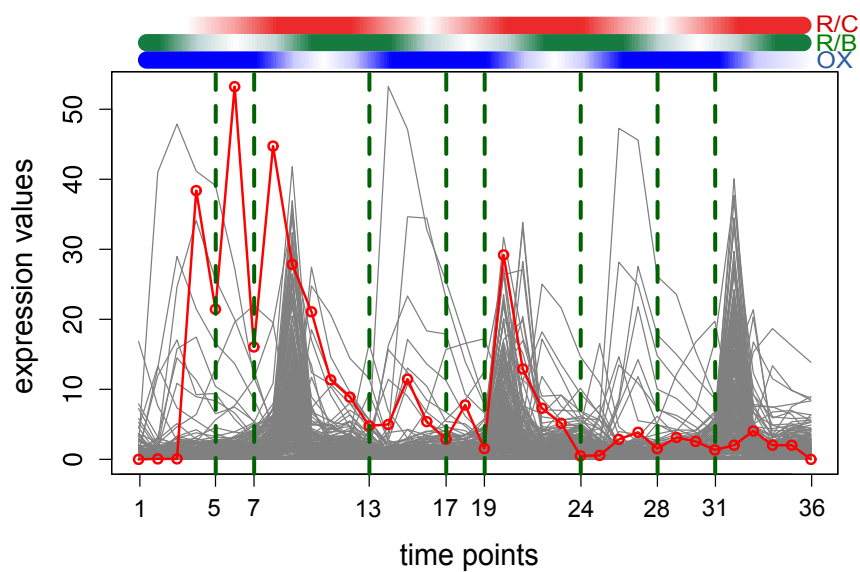

**Figure S2. Segmentation over Yeast's metabolic cycle.** The expression profile of 255 genes illustrated over 36 time points (separated by  $\sim 25$ -min intervals) over three consecutive cell cycles. The green dashed lines show the obtained breakpoints. The red dots, connected by a red line, represent the sequence  $A$  (column-averages of the absolute values of the regression coefficients in the matrix  $C$ ).

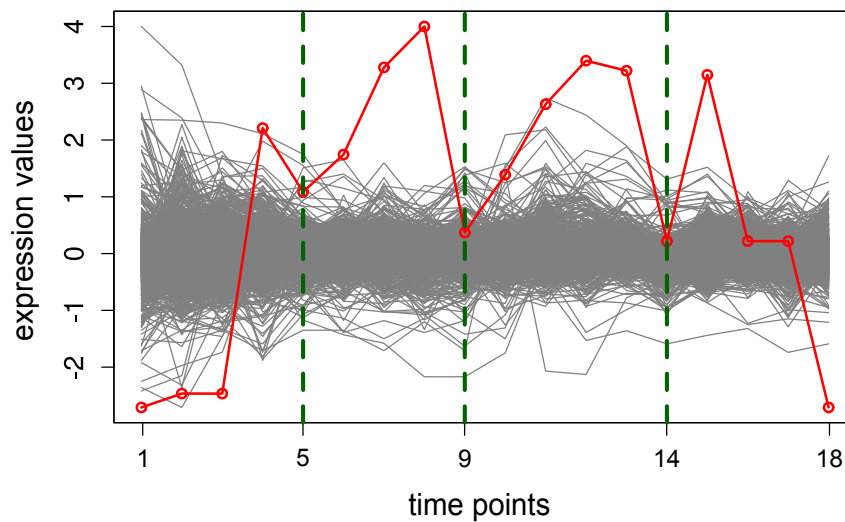

**Figure S3. Segmentation over Yeast's cell cycle.** The green dashed lines show the obtained breakpoints. The red dots, connected by a red line, represent the sequence  $A$  (column-averages of the absolute values of the regression coefficients in the matrix  $C$ ).

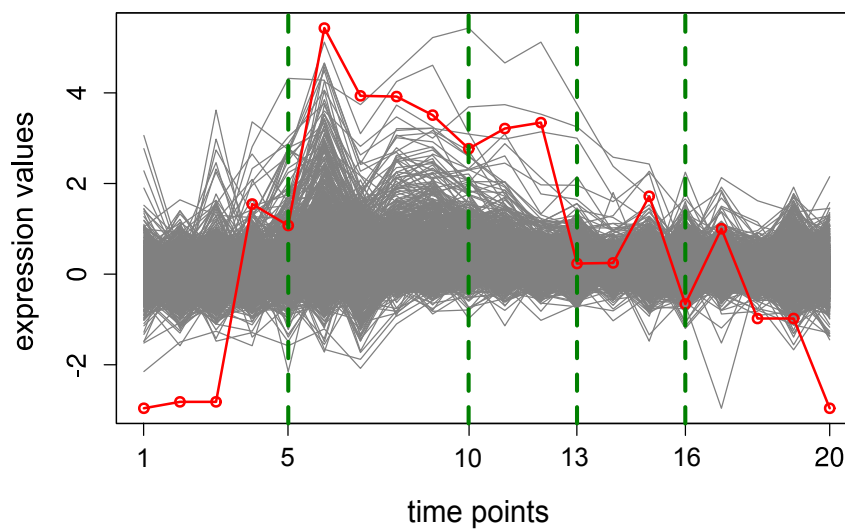

**Figure S4. Segmentation over Yeast's cell cycle.** The green dashed lines show the obtained breakpoints. The red dots, connected by a red line, represent the sequence  $A$  (column-averages of the absolute values of the regression coefficients in the matrix  $C$ ).

## Tables

**Table S1. Optimal segmentation for synthetic data.** The first part of the table comprises the result of the optimal segmentation for synthetic data based on the regularized regression approach implemented in Algorithm 1. The second part includes the result based on Bleakley *et al.* (2011) approach. The third and the fourth parts show the results based on the method of Omranian *et al.* (2013), penalized longest path algorithm using number of segments and distribution of length of the segments to calculate the penalty of a path, respectively. The lower part contains the result based on the method of Ramakrishnan *et al.* (2010). The upper part of the table includes the number of segments  $k$ , breakpoints, and tuning parameters corresponding to fused LASSO regularization parameters,  $\lambda_1$  and  $\lambda_2$ . In the third part of the table, the first and second columns show the name and the type of network properties used to determine the distances: G stands for global, L for local, and LG for local-global. The third column includes the number  $k$  for each of the three methods and the resulting segments are given in the fourth column. The fifth and sixth columns in the third and fourth parts present the values of lower ( $\nu_{min}$ ) and upper ( $\nu_{max}$ ) bound of the tuning parameter  $\nu$  with dynamic programming approach. The lower part also includes minimum and maximum length of the segments, i.e.,  $l_{min}$  and  $l_{max}$ , as parameters of the contending method.

| <b>Algorithm 1</b>                               |      | $k$ | <b>Breakpoints</b>              | $\lambda_1$ | $\lambda_2$ |
|--------------------------------------------------|------|-----|---------------------------------|-------------|-------------|
|                                                  |      | 6   | 7, 12, 16, 21 and 27            | [1,50]      | [1,50]      |
| <b>Bleakley <i>et al.</i> (2011)</b>             |      | $k$ | <b>Breakpoints</b>              |             |             |
|                                                  |      | 5   | 13, 21, 28 and 32               |             |             |
| <b>Omranian <i>et al.</i> Penalized (number)</b> | Type | $k$ | <b>Breakpoints</b>              | $\nu_{min}$ | $\nu_{max}$ |
| relative density                                 | G    | 5   | 4, 8, 12 and 21                 | 0.05        | 6.00        |
| degree                                           | L    | 5   | 4, 8, 12 and 24                 | 1.50        | 11.13       |
| closeness                                        | LG   | 4   | 4, 15 and 20                    | 0.05        | 4.47        |
| betweenness                                      | LG   | 7   | 4, 8, 12, 17, 21 and 29         | 1.06        | 12.10       |
| <b>Omranian <i>et al.</i> Penalized (length)</b> | Type | $k$ | <b>Breakpoints</b>              | $\nu_{min}$ | $\nu_{max}$ |
| relative density                                 | G    | 9   | 4, 8, 12, 16, 20, 24, 28 and 32 | 0.05        | 6.00        |
| degree                                           | L    | 8   | 5, 9, 13, 18, 23, 27 and 32     | 1.50        | 11.13       |
| closeness                                        | LG   | 4   | 4, 16 and 20                    | 0.05        | 4.47        |
| betweenness                                      | LG   | 8   | 4, 9, 13, 17, 21, 25 and 30     | 1.06        | 12.10       |
| <b>Ramakrishnan <i>et al.</i> (2010)</b>         |      | $k$ | <b>Breakpoints</b>              | $l_{min}$   | $l_{max}$   |
|                                                  |      | 6   | 5, 12, 19, 24 and 30            | 4           | 7           |
|                                                  |      | 5   | 7, 12, 21 and 29                | 4           | 9           |
|                                                  |      | 4   | 6, 12 and 24                    | 4           | 12          |
|                                                  |      | 3   | 7 and 22                        | 4           | 15          |
|                                                  |      | 3   | 7 and 25                        | 4           | 20          |
|                                                  |      | 2   | 25                              | 4           | 28          |
|                                                  |      | 2   | 7                               | 4           | 32          |

**Table S2. Optimal segmentation for yeast’s metabolic cycle (YMC) data with the same preprocessing has been applied in Ramakrishnan *et al.* [15].** The first part of the table comprises the result of the optimal segmentation for synthetic data based on the regularized regression approach implemented in Algorithm 1. The second part includes the result based on Bleakley *et al.* (2011) approach. The third and the fourth parts show the results based on the method of Omranian *et al.* (2013), penalized longest path algorithm using number of segments and distribution of length of the segments to calculate the penalty of a path, respectively. The lower part contains the result based on the method of Ramakrishnan *et al.* (2010). The upper part of the table includes the number of segments  $k$ , breakpoints, and tuning parameters corresponding to fused LASSO regularization parameters,  $\lambda_1$  and  $\lambda_2$ . In the third part of the table, the first and second columns show the name and the type of network properties used to determine the distances: G stands for global, L for local, and LG for local-global. The third column includes the number  $k$  for each of the three methods and the resulting segments are given in the fourth column. The fifth and sixth columns in the third and fourth parts present the values of lower ( $\nu_{min}$ ) and upper ( $\nu_{max}$ ) bound of the tuning parameter  $\nu$  with dynamic programming approach. The lower part also includes minimum and maximum length of the segments, i.e.,  $l_{min}$  and  $l_{max}$ , as parameters of the contending method.

| <b>Algorithm 1</b>                               |             | <b><math>k</math></b> | <b>Breakpoints</b>              | $\lambda_1$ | $\lambda_2$ |
|--------------------------------------------------|-------------|-----------------------|---------------------------------|-------------|-------------|
|                                                  |             | 9                     | 5, 7, 13, 17, 19, 24, 28 and 31 | [1,50]      | [1,50]      |
| <b>Bleakley <i>et al.</i> (2011)</b>             |             | <b><math>k</math></b> | <b>Breakpoints</b>              |             |             |
|                                                  |             | 6                     | 8, 9, 26, 31 and 32             |             |             |
| <b>Omranian <i>et al.</i> Penalized (number)</b> | <b>Type</b> | <b><math>k</math></b> | <b>Breakpoints</b>              | $\nu_{min}$ | $\nu_{max}$ |
| relative density                                 | G           | 6                     | 4, 9, 13, 20 and 31             | 0.05        | 5.60        |
| degree                                           | L           | 8                     | 4, 8, 12, 16, 20, 24 and 32     | 4.35        | 13.50       |
| closeness                                        | LG          | 6                     | 4, 9, 17, 21 and 31             | 0.05        | 4.24        |
| betweenness                                      | LG          | 6                     | 4, 8, 12, 20 and 24             | 3.80        | 14.52       |
| <b>Ramakrishnan <i>et al.</i> [15]</b>           |             | <b><math>k</math></b> | <b>Breakpoints</b>              | $l_{min}$   | $l_{max}$   |
|                                                  |             | 8                     | 6, 10, 14, 18, 22, 26 and 31    | 4           | 7           |

**Table S3. Optimal segmentation for yeast’s cell cycle (YCC) data.** The first part of the table comprises the result of the optimal segmentation for synthetic data based on the regularized regression approach implemented in Algorithm 1. The second part includes the result based on Bleakley *et al.* (2011) approach. The third and the fourth parts show the results based on the method of Omranian *et al.* (2013), penalized longest path algorithm using number of segments and distribution of length of the segments to calculate the penalty of a path, respectively. The lower part contains the result based on the method of Ramakrishnan *et al.* (2010). The upper part of the table includes the number of segments  $k$ , breakpoints, and tuning parameters corresponding to fused LASSO regularization parameters,  $\lambda_1$  and  $\lambda_2$ . In the third part of the table, the first and second columns show the name and the type of network properties used to determine the distances: G stands for global, L for local, and LG for local-global. The third column includes the number  $k$  for each of the three methods and the resulting segments are given in the fourth column. The fifth and sixth columns in the third and fourth parts present the values of lower ( $\nu_{min}$ ) and upper ( $\nu_{max}$ ) bound of the tuning parameter  $\nu$  with dynamic programming approach. The lower part also includes minimum and maximum length of the segments, i.e.,  $l_{min}$  and  $l_{max}$ , as parameters of the contending method.

| <b>Algorithm 1</b>                               |             | <b><math>k</math></b> | <b>Breakpoints</b> | $\lambda_1$ | $\lambda_2$ |
|--------------------------------------------------|-------------|-----------------------|--------------------|-------------|-------------|
|                                                  |             | 4                     | 4, 9 and 14        | [1,50]      | [1,50]      |
| <b>Bleakley <i>et al.</i> (2011)</b>             |             | <b><math>k</math></b> | <b>Breakpoints</b> |             |             |
|                                                  |             | 2                     | 4                  |             |             |
| <b>Omranian <i>et al.</i> Penalized (number)</b> | <b>Type</b> | <b><math>k</math></b> | <b>Breakpoints</b> | $\nu_{min}$ | $\nu_{max}$ |
| relative density                                 | G           | 4                     | 4, 8 and 12        | 0.05        | 4.08        |
| degree                                           | L           | 3                     | 6 and 14           | 6.64        | 12.72       |
| closeness                                        | LG          | 3                     | 5 and 14           | 0.05        | 5.64        |
| betweenness                                      | LG          | 4                     | 4, 8 and 14        | 9.15        | 15.38       |
| <b>Ramakrishnan <i>et al.</i> [15]</b>           |             | <b><math>k</math></b> | <b>Breakpoints</b> | $l_{min}$   | $l_{max}$   |
|                                                  |             | 6                     | 3, 6, 9, 12 and 15 | 3           | 5           |

**Table S4. Optimal segmentation for data from oxidative stress, induced by hydrogen peroxide (HP), on yeast’s cell cycle.** The first part of the table comprises the result of the optimal segmentation for synthetic data based on the regularized regression approach implemented in Algorithm 1. The second part includes the result based on Bleakley *et al.* (2011) approach. The third and the fourth parts show the results based on the method of Omranian *et al.* (2013), penalized longest path algorithm using number of segments and distribution of length of the segments to calculate the penalty of a path, respectively. The lower part contains the result based on the method of Ramakrishnan *et al.* (2010). The upper part of the table includes the number of segments  $k$ , breakpoints, and tuning parameters corresponding to fused LASSO regularization parameters,  $\lambda_1$  and  $\lambda_2$ . In the third part of the table, the first and second columns show the name and the type of network properties used to determine the distances: G stands for global, L for local, and LG for local-global. The third column includes the number  $k$  for each of the three methods and the resulting segments are given in the fourth column. The fifth and sixth columns in the third and fourth parts present the values of lower ( $\nu_{min}$ ) and upper ( $\nu_{max}$ ) bound of the tuning parameter  $\nu$  with dynamic programming approach. The lower part also includes minimum and maximum length of the segments, i.e.,  $l_{min}$  and  $l_{max}$ , as parameters of the contending method.

| <b>Algorithm 1</b>                               |             | <b><math>k</math></b> | <b>Breakpoints</b> | $\lambda_1$ | $\lambda_2$ |
|--------------------------------------------------|-------------|-----------------------|--------------------|-------------|-------------|
|                                                  |             | 5                     | 5, 10, 13 and 16   | [1,50]      | [1,50]      |
| <b>Bleakley <i>et al.</i> (2011)</b>             |             | <b><math>k</math></b> | <b>Breakpoints</b> |             |             |
|                                                  |             | 4                     | 5, 10 and 15       |             |             |
| <b>Omranian <i>et al.</i> Penalized (number)</b> | <b>Type</b> | <b><math>k</math></b> | <b>Breakpoints</b> | $\nu_{min}$ | $\nu_{max}$ |
| relative density                                 | G           | 3                     | 4 and 15           | 0.05        | 4.43        |
| degree                                           | L           | 3                     | 5 and 15           | 5.78        | 12.60       |
| closeness                                        | LG          | 4                     | 4, 8 and 16        | 0.05        | 5.71        |
| betweenness                                      | LG          | 4                     | 5, 9 and 13        | 8.43        | 15.11       |
| <b>Ramakrishnan <i>et al.</i> [15]</b>           |             | <b><math>k</math></b> | <b>Breakpoints</b> | $l_{min}$   | $l_{max}$   |
|                                                  |             | 4                     | 4, 11 and 14       | 3           | 7           |

**Supplementary Table S5 - Over-enriched BP terms at significance level 0.05.** The yeast's metabolic cell cycle transcription data, biologically clustered into two clusters. The result of GO enrichment analysis using biological process terms and significance level of 0.05 are

**cluster 1 -**

| BP         | P_value    | GO Term                                                                | Genes                                                                                                                                                                                                                                                                                                                                                     | Names                                                                                                                                                                                                          |
|------------|------------|------------------------------------------------------------------------|-----------------------------------------------------------------------------------------------------------------------------------------------------------------------------------------------------------------------------------------------------------------------------------------------------------------------------------------------------------|----------------------------------------------------------------------------------------------------------------------------------------------------------------------------------------------------------------|
| GO:0000003 | 2.39E-05   | reproduction                                                           | 4460_i_at;6459_at;7859_at                                                                                                                                                                                                                                                                                                                                 | SAE3;MCD1;MEIS                                                                                                                                                                                                 |
| GO:0000079 | 0.000371   | regulation of cyclin-dependent protein kinase activity                 | 5609_at;7993_at                                                                                                                                                                                                                                                                                                                                           | DSE1;CLN2                                                                                                                                                                                                      |
| GO:0000080 | 0.00993895 | G1 phase of mitotic cell cycle                                         | 4899_at                                                                                                                                                                                                                                                                                                                                                   | CLB6                                                                                                                                                                                                           |
| GO:0000082 | 0.02012023 | G1/S transition of mitotic cell cycle                                  | 6337_at;9150_at;9683_at                                                                                                                                                                                                                                                                                                                                   | SWI5;PCL1;YOX1                                                                                                                                                                                                 |
| GO:0000087 | 0.0016603  | M phase of mitotic cell cycle                                          | 4899_at;6641_at;7993_at;9150_at                                                                                                                                                                                                                                                                                                                           | CLB6;PCL9;CLN2;PCL1                                                                                                                                                                                            |
| GO:0000114 | 0.02012023 | regulation of transcription involved in G1 phase of mitotic cell cycle | 3628_f_at                                                                                                                                                                                                                                                                                                                                                 | COS10                                                                                                                                                                                                          |
| GO:0000278 | 1.78E-06   | mitotic cell cycle                                                     | 7546_at                                                                                                                                                                                                                                                                                                                                                   | OPT2                                                                                                                                                                                                           |
| GO:0000279 | 2.69E-07   | M phase                                                                | 6453_at;6455_s_at;7554_at                                                                                                                                                                                                                                                                                                                                 | ENAS;ENA2;ARR3                                                                                                                                                                                                 |
| GO:0000280 | 0.00993895 | nuclear division                                                       | 10164_at;10576_at;10755_at;11079_at;11256_at;11301_i_at;3628_f_at;3934_at;3989_at;4358_at;4392_at;4460_i_at;4787_at;4796_at;4899_at;5177_at;5609_at;5643_at;5655_n_at;6337_at;6453_at;6455_s_at;6459_at;6641_at;7204_at;7546_at;7554_at;7777_at;7859_at;7907_at;7912_at;7981_at;7993_at;8251_at;8716_s_at;8922_at;9150_at;9185_at;9203_at;9683_at;9712_at | TOS4;PRY2;PIR1;PRY3;IMAS;FLO1;COS10;RTM1;B4;SPO16;DSE2;SAE3;TOS2;BNS1;CLB6;RCK1;DSE1;RNR1;ME1;SWI5;ENAS;ENA2;MCD1;PCL9;AMN1;OPT2;ARR3;ECM23;MEIS;SVS1;AIM44;GRE1;CLN2;SFG1;AAD15;SUN4;PCL1;TOS6;EGT2;YOX1;AIM3 |
| GO:0000707 | 0.02012023 | meiotic DNA recombinase assembly                                       | 3989_at                                                                                                                                                                                                                                                                                                                                                   | B4                                                                                                                                                                                                             |
| GO:0000724 | 0.02012023 | double-strand break repair via homologous recombination                | 4899_at                                                                                                                                                                                                                                                                                                                                                   | CLB6                                                                                                                                                                                                           |
| GO:0000725 | 0.02012023 | recombinational repair                                                 | 6459_at                                                                                                                                                                                                                                                                                                                                                   | MCD1                                                                                                                                                                                                           |
| GO:0000730 | 0.02012023 | DNA recombinase assembly                                               | 7204_at                                                                                                                                                                                                                                                                                                                                                   | AMN1                                                                                                                                                                                                           |
| GO:0000749 | 0.02691926 | response to pheromone involved in conjugation with cellular fusion     | 6459_at                                                                                                                                                                                                                                                                                                                                                   | MCD1                                                                                                                                                                                                           |
| GO:0000910 | 0.02691926 | cytokinesis                                                            | 6453_at;6455_s_at;7554_at                                                                                                                                                                                                                                                                                                                                 | ENAS;ENA2;ARR3                                                                                                                                                                                                 |
| GO:0000920 | 0.02012023 | cytokinetic cell separation                                            | 6459_at;7204_at;9203_at                                                                                                                                                                                                                                                                                                                                   | MCD1;AMN1;EGT2                                                                                                                                                                                                 |
| GO:0001932 | 0.000371   | regulation of protein phosphorylation                                  | 4358_at;6459_at;7204_at;7546_at;8922_at;9150_at;9203_at                                                                                                                                                                                                                                                                                                   | SPO16;MCD1;AMN1;OPT2;SUN4;PCL1;EGT2                                                                                                                                                                            |
| GO:0006259 | 0.0002024  | DNA metabolic process                                                  | 3989_at                                                                                                                                                                                                                                                                                                                                                   | B4                                                                                                                                                                                                             |
| GO:0006281 | 0.02235693 | DNA repair                                                             | 6459_at                                                                                                                                                                                                                                                                                                                                                   | MCD1                                                                                                                                                                                                           |
| GO:0006302 | 0.00993895 | double-strand break repair                                             | 6459_at                                                                                                                                                                                                                                                                                                                                                   | MCD1                                                                                                                                                                                                           |
| GO:0006310 | 0.00026088 | DNA recombination                                                      | 6459_at                                                                                                                                                                                                                                                                                                                                                   | MCD1                                                                                                                                                                                                           |
| GO:0006468 | 4.87E-05   | protein phosphorylation                                                | 4358_at;4460_i_at;4787_at;4796_at;5177_at;5609_at;5655_n_at;6337_at;7859_at;7993_at                                                                                                                                                                                                                                                                       | SPO16;SAE3;TOS2;BNS1;RCK1;ME1;DSE1;SWI5;MEIS;CLN2                                                                                                                                                              |
| GO:0006754 | 0.02012023 | ATP biosynthetic process                                               | 4358_at;4460_i_at;4796_at;5177_at;5655_n_at;6337_at;6459_at;7204_at;7859_at;9203_at                                                                                                                                                                                                                                                                       | SPO16;SAE3;BNS1;RCK1;ME1;SWI5;MCD1;AMN1;MEIS;EGT2                                                                                                                                                              |
| GO:0006793 | 0.01148149 | phosphorus metabolic process                                           | 3989_at;4358_at;4460_i_at;4899_at;5643_at;5655_n_at;6337_at;6459_at;7859_at                                                                                                                                                                                                                                                                               | B4;SPO16;SAE3;CLB6;RNR1;ME1;SWI5;MCD1;MEIS                                                                                                                                                                     |
| GO:0006796 | 0.01148149 | phosphate-containing compound metabolic process                        | 4899_at;5177_at;5643_at;6453_at;6455_s_at;6641_at;7993_at;9150_at                                                                                                                                                                                                                                                                                         | CLB6;RCK1;RNR1;ENAS;ENA2;PCL9;CLN2;PCL1                                                                                                                                                                        |
| GO:0006814 | 0.00993895 | sodium ion transport                                                   | 4899_at;5177_at;5643_at;6453_at;6455_s_at;6641_at;7993_at;9150_at                                                                                                                                                                                                                                                                                         | CLB6;RCK1;RNR1;ENAS;ENA2;PCL9;CLN2;PCL1                                                                                                                                                                        |
| GO:0006869 | 0.02012023 | lipid transport                                                        | 7554_at                                                                                                                                                                                                                                                                                                                                                   | ARR3                                                                                                                                                                                                           |
| GO:0006950 | 0.00488052 | response to stress                                                     | 8922_at                                                                                                                                                                                                                                                                                                                                                   | SUN4                                                                                                                                                                                                           |
| GO:0006974 | 0.00445913 | response to DNA damage stimulus                                        | 6459_at;7204_at;9203_at                                                                                                                                                                                                                                                                                                                                   | MCD1;AMN1;EGT2                                                                                                                                                                                                 |
| GO:0007049 | 4.18E-10   | cell cycle                                                             | 4787_at                                                                                                                                                                                                                                                                                                                                                   | TOS2                                                                                                                                                                                                           |
| GO:0007067 | 0.00276299 | mitosis                                                                | 4392_at;7777_at;8251_at                                                                                                                                                                                                                                                                                                                                   | DSE2;ECM23;SFG1                                                                                                                                                                                                |
| GO:0007109 | 0.02012023 | cytokinesis, completion of separation                                  | 4899_at;5177_at;6641_at;7993_at;9150_at                                                                                                                                                                                                                                                                                                                   | CLB6;RCK1;PCL9;CLN2;PCL1                                                                                                                                                                                       |
| GO:0007124 | 0.00993895 | pleurothylal growth                                                    | 3989_at;4358_at;4460_i_at;4899_at;5643_at;5655_n_at;6337_at;6453_at;6455_s_at;6459_at;6641_at;7777_at;7859_at;8251_at;9683_at                                                                                                                                                                                                                             | B4;SPO16;SAE3;CLB6;RNR1;ME1;SWI5;ENAS;ENA2;MCD1;PCL9;ECM23;MEIS;SFG1;YOX1                                                                                                                                      |
| GO:0007126 | 0.00013919 | meiosis                                                                | 6459_at                                                                                                                                                                                                                                                                                                                                                   | MCD1                                                                                                                                                                                                           |
| GO:0007127 | 0.0016603  | meiosis I                                                              | 4392_at;5609_at;8922_at;9203_at                                                                                                                                                                                                                                                                                                                           | DSE2;DSE1;SUN4;EGT2                                                                                                                                                                                            |
| GO:0007131 | 0.00276299 | reciprocal meiotic recombination                                       | 4899_at;6641_at;7993_at;9150_at                                                                                                                                                                                                                                                                                                                           | CLB6;PCL9;CLN2;PCL1                                                                                                                                                                                            |
| GO:0009145 | 0.02012023 | purine nucleoside triphosphate biosynthetic process                    | 6337_at;6641_at;7777_at;8251_at;9683_at                                                                                                                                                                                                                                                                                                                   | SWI5;PCL9;ECM23;SFG1;YOX1                                                                                                                                                                                      |
| GO:0009206 | 0.02012023 | purine ribonucleoside triphosphate biosynthetic process                | 6337_at;6641_at;9683_at                                                                                                                                                                                                                                                                                                                                   | SWI5;PCL9;YOX1                                                                                                                                                                                                 |
| GO:0009966 | 0.02012023 | regulation of signal transduction                                      | 10576_at;10755_at;11079_at;3628_f_at;6453_at;6455_s_at;7546_at;7554_at                                                                                                                                                                                                                                                                                    | PRY2;PIR1;PRY3;COS10;ENAS;ENA2;OPT2;ARR3                                                                                                                                                                       |
| GO:0010564 | 0.0016603  | regulation of cell cycle process                                       | 4392_at;5609_at                                                                                                                                                                                                                                                                                                                                           | DSE2;DSE1                                                                                                                                                                                                      |
| GO:0010646 | 0.00276299 | regulation of cell communication                                       | 6453_at;6455_s_at                                                                                                                                                                                                                                                                                                                                         | ENAS;ENA2                                                                                                                                                                                                      |
| GO:0010876 | 0.02012023 | lipid localization                                                     | 5609_at;7993_at                                                                                                                                                                                                                                                                                                                                           | DSE1;CLN2                                                                                                                                                                                                      |
| GO:0015672 | 0.00993895 | monovalent inorganic cation transport                                  | 8922_at                                                                                                                                                                                                                                                                                                                                                   | SUN4                                                                                                                                                                                                           |
| GO:0015850 | 0.02012023 | organic hydroxy compound transport                                     | 4358_at;6337_at                                                                                                                                                                                                                                                                                                                                           | SPO16;SWI5                                                                                                                                                                                                     |
| GO:0015918 | 0.02012023 | sterol transport                                                       | 4899_at;5177_at;6641_at;7993_at;9150_at                                                                                                                                                                                                                                                                                                                   | CLB6;RCK1;PCL9;CLN2;PCL1                                                                                                                                                                                       |
| GO:0016049 | 0.00993895 | cell growth                                                            | 10755_at                                                                                                                                                                                                                                                                                                                                                  | PIR1                                                                                                                                                                                                           |
| GO:0016310 | 0.00194309 | phosphorylation                                                        | 5609_at;7993_at                                                                                                                                                                                                                                                                                                                                           | DSE1;CLN2                                                                                                                                                                                                      |
| GO:0019220 | 0.000371   | regulation of phosphate metabolic process                              | 4460_i_at;6459_at;7859_at                                                                                                                                                                                                                                                                                                                                 | SAE3;MCD1;MEIS                                                                                                                                                                                                 |
| GO:0019236 | 0.02012023 | response to pheromone                                                  | 10164_at;11301_i_at;4460_i_at;6459_at;7859_at;7981_at;9150_at                                                                                                                                                                                                                                                                                             | TOS4;FLO1;SAE3;MCD1;MEIS;GRE1;PCL1                                                                                                                                                                             |
| GO:0022402 | 1.51E-09   | cell cycle process                                                     | 7204_at                                                                                                                                                                                                                                                                                                                                                   | AMN1                                                                                                                                                                                                           |
| GO:0022403 | 3.59E-10   | cell cycle phase                                                       | 4460_i_at;7859_at                                                                                                                                                                                                                                                                                                                                         | SAE3;MEIS                                                                                                                                                                                                      |
| GO:0022414 | 0.00445913 | reproductive process                                                   | 6459_at                                                                                                                                                                                                                                                                                                                                                   | MCD1                                                                                                                                                                                                           |
| GO:0023051 | 0.02012023 | regulation of signaling                                                | 4358_at                                                                                                                                                                                                                                                                                                                                                   | SPO16                                                                                                                                                                                                          |
| GO:0030001 | 0.0025472  | metal ion transport                                                    | 4899_at;6641_at                                                                                                                                                                                                                                                                                                                                           | CLB6;PCL9                                                                                                                                                                                                      |
| GO:0030154 | 0.00993895 | cell differentiation                                                   | 7993_at                                                                                                                                                                                                                                                                                                                                                   | CLN2                                                                                                                                                                                                           |
| GO:0030435 | 0.04025472 | sporulation resulting in formation of a cellular spore                 | 4460_i_at;7859_at                                                                                                                                                                                                                                                                                                                                         | SAE3;MEIS                                                                                                                                                                                                      |
| GO:0030447 | 0.0016603  | filamentous growth                                                     | 7993_at                                                                                                                                                                                                                                                                                                                                                   | CLN2                                                                                                                                                                                                           |
| GO:0031399 | 0.0016603  | regulation of protein modification process                             | 11256_at                                                                                                                                                                                                                                                                                                                                                  | IMAS                                                                                                                                                                                                           |
| GO:0032268 | 0.02691926 | regulation of cellular protein metabolic process                       | 6453_at;6455_s_at                                                                                                                                                                                                                                                                                                                                         | ENAS;ENA2                                                                                                                                                                                                      |
| GO:0032502 | 0.02691926 | developmental process                                                  | 10576_at;11079_at                                                                                                                                                                                                                                                                                                                                         | PRY2;PRY3                                                                                                                                                                                                      |
| GO:0032878 | 0.02012023 | regulation of establishment or maintenance of cell polarity            | 4358_at;4460_i_at;4796_at;4899_at;5177_at;5609_at;5655_n_at;6337_at;6459_at;6641_at;7204_at;7859_at;7993_at;8251_at;8922_at;9150_at;9203_at;9683_at                                                                                                                                                                                                       | SPO16;SAE3;BNS1;CLB6;RCK1;DSE1;ME1;SWI5;MCD1;PCL9;AMN1;MEIS;CLN2;SFG1;SUN4;PCL1;EGT2;YOX1                                                                                                                      |
| GO:0033554 | 0.00037279 | cellular response to stress                                            | 11301_i_at                                                                                                                                                                                                                                                                                                                                                | FLO1                                                                                                                                                                                                           |
| GO:0035825 | 0.00276299 | reciprocal DNA recombination                                           | 4460_i_at;7859_at                                                                                                                                                                                                                                                                                                                                         | SAE3;MEIS                                                                                                                                                                                                      |
| GO:0040007 | 0.00081565 | growth                                                                 | 6453_at;6455_s_at                                                                                                                                                                                                                                                                                                                                         | ENAS;ENA2                                                                                                                                                                                                      |
| GO:0040020 | 0.02012023 | regulation of meiosis                                                  | 6459_at                                                                                                                                                                                                                                                                                                                                                   | MCD1                                                                                                                                                                                                           |
| GO:0042221 | 0.01669113 | response to chemical stimulus                                          | 11256_at                                                                                                                                                                                                                                                                                                                                                  | IMAS                                                                                                                                                                                                           |
| GO:0042325 | 0.000371   | regulation of phosphorylation                                          | 7204_at                                                                                                                                                                                                                                                                                                                                                   | AMN1                                                                                                                                                                                                           |
| GO:0043549 | 0.000371   | regulation of kinase activity                                          | 6641_at                                                                                                                                                                                                                                                                                                                                                   | PCL9                                                                                                                                                                                                           |
| GO:0043934 | 0.04025472 | sporulation                                                            | 4899_at                                                                                                                                                                                                                                                                                                                                                   | CLB6                                                                                                                                                                                                           |
| GO:0044182 | 0.0016603  | filamentous growth of a population of unicellular organisms            | 6337_at;6459_at;7204_at;9203_at                                                                                                                                                                                                                                                                                                                           | SWI5;MCD1;AMN1;EGT2                                                                                                                                                                                            |
| GO:0044699 | 5.29E-06   | single-organism process                                                | 6337_at;9683_at                                                                                                                                                                                                                                                                                                                                           | SWI5;YOX1                                                                                                                                                                                                      |
| GO:0044763 | 0.0001786  | single-organism cellular process                                       | 9683_at                                                                                                                                                                                                                                                                                                                                                   | YOX1                                                                                                                                                                                                           |
| GO:0044764 | 0.02235693 | multi-organism cellular process                                        | 4899_at;6337_at;6459_at;6641_at;7204_at;8251_at;9150_at;9203_at;9683_at                                                                                                                                                                                                                                                                                   | CLB6;SWI5;MCD1;PCL9;AMN1;SFG1;PCL1;EGT2;YOX1                                                                                                                                                                   |
| GO:0045003 | 0.02012023 | double-strand break repair via synthesis-dependent strand annealing    | 3989_at                                                                                                                                                                                                                                                                                                                                                   | B4                                                                                                                                                                                                             |
| GO:0045859 | 0.000371   | regulation of protein kinase activity                                  | 4460_i_at;7859_at                                                                                                                                                                                                                                                                                                                                         | SAE3;MEIS                                                                                                                                                                                                      |
| GO:0046034 | 0.02012023 | ATP metabolic process                                                  | 5609_at                                                                                                                                                                                                                                                                                                                                                   | DSE1                                                                                                                                                                                                           |
| GO:0046285 | 0.00993895 | organelle fission                                                      | 4392_at;5609_at                                                                                                                                                                                                                                                                                                                                           | DSE2;DSE1                                                                                                                                                                                                      |
| GO:0048583 | 0.00276299 | regulation of response to stimulus                                     | 7204_at                                                                                                                                                                                                                                                                                                                                                   | AMN1                                                                                                                                                                                                           |
| GO:0048610 | 1.78E-06   | cellular process involved in reproduction                              | 5609_at                                                                                                                                                                                                                                                                                                                                                   | DSE1                                                                                                                                                                                                           |
| GO:0048646 | 0.04025472 | anatomical structure formation involved in morphogenesis               | 11256_at                                                                                                                                                                                                                                                                                                                                                  | IMAS                                                                                                                                                                                                           |
| GO:0048869 | 0.01669113 | cellular developmental process                                         | 8716_s_at                                                                                                                                                                                                                                                                                                                                                 | AAD15                                                                                                                                                                                                          |
| GO:0050789 | 0.02287105 | regulation of biological process                                       | 3989_at;4358_at;4460_i_at;4899_at;5643_at;5655_n_at;6337_at;6453_at;6455_s_at;6459_at;6641_at;7777_at;7859_at;8251_at;9683_at                                                                                                                                                                                                                             | B4;SPO16;SAE3;CLB6;RNR1;ME1;SWI5;ENAS;ENA2;MCD1;PCL9;ECM23;MEIS;SFG1;YOX1                                                                                                                                      |
| GO:0050790 | 0.00445913 | regulation of catalytic activity                                       | 4899_at;5643_at                                                                                                                                                                                                                                                                                                                                           | CLB6;RNR1                                                                                                                                                                                                      |
| GO:0050794 | 0.02287105 | regulation of cellular process                                         | 3989_at;4358_at;4460_i_at;5655_n_at;7859_at                                                                                                                                                                                                                                                                                                               | B4;SPO16;SAE3;ME1;MEIS                                                                                                                                                                                         |
| GO:0050896 | 0.00022598 | response to stimulus                                                   | 3989_at                                                                                                                                                                                                                                                                                                                                                   | B4                                                                                                                                                                                                             |
| GO:0051174 | 0.000371   | regulation of phosphorus metabolic process                             | 5643_at;6453_at;6455_s_at                                                                                                                                                                                                                                                                                                                                 | RNR1;ENAS;ENA2                                                                                                                                                                                                 |
| GO:0051246 | 0.02691926 | regulation of protein metabolic process                                | 6453_at;6455_s_at;7554_at                                                                                                                                                                                                                                                                                                                                 | ENAS;ENA2;ARR3                                                                                                                                                                                                 |
| GO:0051301 | 2.21E-06   | cell division                                                          | 7546_at                                                                                                                                                                                                                                                                                                                                                   | OPT2                                                                                                                                                                                                           |
| GO:0051318 | 0.00993895 | G1 phase                                                               | 6337_at                                                                                                                                                                                                                                                                                                                                                   | SWI5                                                                                                                                                                                                           |
| GO:0051321 | 0.00013919 | meiotic cell cycle                                                     | 4787_at                                                                                                                                                                                                                                                                                                                                                   | TOS2                                                                                                                                                                                                           |
| GO:0051325 | 0.00026088 | interphase                                                             | 7993_at                                                                                                                                                                                                                                                                                                                                                   | CLN2                                                                                                                                                                                                           |
| GO:0051327 | 0.00013919 | M phase of meiotic cell cycle                                          | 6455_s_at                                                                                                                                                                                                                                                                                                                                                 | ENA2                                                                                                                                                                                                           |
| GO:0051329 | 0.00026088 | interphase of mitotic cell cycle                                       | 6337_at                                                                                                                                                                                                                                                                                                                                                   | SWI5                                                                                                                                                                                                           |
| GO:0051338 | 0.000371   | regulation of transferase activity                                     | 7546_at                                                                                                                                                                                                                                                                                                                                                   | OPT2                                                                                                                                                                                                           |
| GO:0051445 | 0.02012023 | regulation of meiotic cell cycle                                       | 10164_at;4460_i_at;6459_at;7859_at                                                                                                                                                                                                                                                                                                                        | TOS4;SAE3;MCD1;MEIS                                                                                                                                                                                            |
| GO:0051704 | 0.02235693 | multi-organism process                                                 | 11301_i_at                                                                                                                                                                                                                                                                                                                                                | FLO1                                                                                                                                                                                                           |
| GO:0051716 | 0.00027892 | cellular response to stimulus                                          | 6337_at;6641_at;9683_at                                                                                                                                                                                                                                                                                                                                   | SWI5;PCL9;YOX1                                                                                                                                                                                                 |
| GO:0051726 | 6.67E-05   | regulation of cell cycle                                               | 3989_at                                                                                                                                                                                                                                                                                                                                                   | B4                                                                                                                                                                                                             |
| GO:0065007 | 0.03178553 | biological regulation                                                  | 9150_at                                                                                                                                                                                                                                                                                                                                                   | PCL1                                                                                                                                                                                                           |
| GO:0065009 | 0.00445913 | regulation of molecular function                                       | 7204_at                                                                                                                                                                                                                                                                                                                                                   | AMN1                                                                                                                                                                                                           |
| GO:0070783 | 0.0016603  | growth of unicellular organism as a thread of attached cells           | 3989_at                                                                                                                                                                                                                                                                                                                                                   | B4                                                                                                                                                                                                             |
| GO:0071444 | 0.02012023 | cellular response to pheromone                                         | 6337_at;6641_at;7777_at;8251_at;9683_at                                                                                                                                                                                                                                                                                                                   | SWI5;PCL9;ECM23;SFG1;YOX1                                                                                                                                                                                      |
| GO:0071900 | 0.000371   | regulation of protein serine/threonine kinase activity                 | 3989_at;4358_at;4460_i_at;4899_at;5643_at;5655_n_at;6337_at;6453_at;6455_s_at;6459_at;6641_at;7777_at;7859_at;8251_at;9683_at                                                                                                                                                                                                                             | B4;SPO16;SAE3;CLB6;RNR1;ME1;SWI5;ENAS;ENA2;MCD1;PCL9;ECM23;MEIS;SFG1;YOX1                                                                                                                                      |
| GO:2000241 | 0.000371   | regulation of reproductive process                                     | 9150_at                                                                                                                                                                                                                                                                                                                                                   | PCL1                                                                                                                                                                                                           |



| Cluster 2 - BP | P_value    | GO Term                                                                                   | Genes                                                                                                                                                                                                                                                                                                                                                     | Names                                                                                                                                                                                                              |
|----------------|------------|-------------------------------------------------------------------------------------------|-----------------------------------------------------------------------------------------------------------------------------------------------------------------------------------------------------------------------------------------------------------------------------------------------------------------------------------------------------------|--------------------------------------------------------------------------------------------------------------------------------------------------------------------------------------------------------------------|
| GO:0000460     | 0.02023891 | maturation of 5.8S rRNA                                                                   | 4899_at;6337_at;6459_at;6641_at;7204_at;8251_at;9150_at;9203_at;9683_at                                                                                                                                                                                                                                                                                   | CLB6;SWIS;MCD1;PCL9;AMN1;SFG1;PCL1;EGT2;YOX1                                                                                                                                                                       |
| GO:0000462     | 0.00703327 | maturation of SSU-rRNA from tricistronic rRNA transcript (SSU-rRNA, 5.8S rRNA, LSU-rRNA)  | 6459_at                                                                                                                                                                                                                                                                                                                                                   | MCD1                                                                                                                                                                                                               |
| GO:0000466     | 0.02023891 | maturation of 5.8S rRNA from tricistronic rRNA transcript (SSU-rRNA, 5.8S rRNA, LSU-rRNA) | 4899_at;6641_at                                                                                                                                                                                                                                                                                                                                           | CLB6;PCL9                                                                                                                                                                                                          |
| GO:0000469     | 0.04369765 | cleavage involved in rRNA processing                                                      | 5609_at                                                                                                                                                                                                                                                                                                                                                   | DSE1                                                                                                                                                                                                               |
| GO:0006139     | 6.06E-11   | nucleobase-containing compound metabolic process                                          | 4460_i_at;7859_at                                                                                                                                                                                                                                                                                                                                         | SAE3;MEI5                                                                                                                                                                                                          |
| GO:0006364     | 1.06E-06   | rRNA processing                                                                           | 6453_at;6455_s_at                                                                                                                                                                                                                                                                                                                                         | ENAS;ENA2                                                                                                                                                                                                          |
| GO:0006396     | 1.39E-07   | rRNA processing                                                                           | 3989_at                                                                                                                                                                                                                                                                                                                                                   | BI4                                                                                                                                                                                                                |
| GO:0006725     | 4.65E-11   | cellular aromatic compound metabolic process                                              | 6337_at;9683_at                                                                                                                                                                                                                                                                                                                                           | SWIS;YOX1                                                                                                                                                                                                          |
| GO:0006807     | 9.07E-12   | nitrogen compound metabolic process                                                       | 6337_at;9150_at;9683_at                                                                                                                                                                                                                                                                                                                                   | SWIS;PCL1;YOX1                                                                                                                                                                                                     |
| GO:0006810     | 0.00270541 | transport                                                                                 | 6459_at                                                                                                                                                                                                                                                                                                                                                   | MCD1                                                                                                                                                                                                               |
| GO:0006996     | 0.0104987  | organelle organization                                                                    | 7204_at                                                                                                                                                                                                                                                                                                                                                   | AMN1                                                                                                                                                                                                               |
| GO:0007049     | 0.02621421 | cell cycle                                                                                | 4392_at;5609_at;8922_at;9203_at                                                                                                                                                                                                                                                                                                                           | DSE2;DSE1;SUN4;EGT2                                                                                                                                                                                                |
| GO:0008152     | 3.64E-11   | metabolic process                                                                         | 4358_at;6337_at                                                                                                                                                                                                                                                                                                                                           | SPO16;SWIS                                                                                                                                                                                                         |
| GO:0009058     | 0.00155379 | biosynthetic process                                                                      | 6337_at;6641_at;7777_at;8251_at;9683_at                                                                                                                                                                                                                                                                                                                   | SWIS;PCL9;ECM23;SFG1;YOX1                                                                                                                                                                                          |
| GO:0009059     | 0.01347037 | macromolecule biosynthetic process                                                        | 6337_at;6641_at;7777_at;8251_at;9683_at                                                                                                                                                                                                                                                                                                                   | SWIS;PCL9;ECM23;SFG1;YOX1                                                                                                                                                                                          |
| GO:0009987     | 9.32E-21   | cellular process                                                                          | 4358_at;4460_l_at;4796_at;5177_at;5655_n_at;6337_at;6459_at;7204_at;7859_at;9203_at                                                                                                                                                                                                                                                                       | SPO16;SAE3;BNS1;RCK1;MEI4;SWIS;MCD1;AMN1;MEI5;EGT2                                                                                                                                                                 |
| GO:0010467     | 5.94E-09   | gene expression                                                                           | 7993_at                                                                                                                                                                                                                                                                                                                                                   | CLN2                                                                                                                                                                                                               |
| GO:0016043     | 0.00134219 | cellular component organization                                                           | 4392_at;5609_at                                                                                                                                                                                                                                                                                                                                           | DSE2;DSE1                                                                                                                                                                                                          |
| GO:0016070     | 2.19E-08   | rRNA metabolic process                                                                    | 4899_at;6641_at;7993_at;9150_at                                                                                                                                                                                                                                                                                                                           | CLB6;PCL9;CLN2;PCL1                                                                                                                                                                                                |
| GO:0016072     | 8.84E-07   | rRNA metabolic process                                                                    | 5609_at;7993_at                                                                                                                                                                                                                                                                                                                                           | DSE1;CLN2                                                                                                                                                                                                          |
| GO:0018130     | 0.02713677 | heterocycle biosynthetic process                                                          | 4460_i_at;7859_at                                                                                                                                                                                                                                                                                                                                         | SAE3;MEI5                                                                                                                                                                                                          |
| GO:0019438     | 0.02713677 | aromatic compound biosynthetic process                                                    | 11301_i_at                                                                                                                                                                                                                                                                                                                                                | FLO1                                                                                                                                                                                                               |
| GO:0022607     | 0.02621421 | cellular component assembly                                                               | 5609_at                                                                                                                                                                                                                                                                                                                                                   | DSE1                                                                                                                                                                                                               |
| GO:0022613     | 2.05E-07   | ribonucleoprotein complex biogenesis                                                      | 8716_s_at                                                                                                                                                                                                                                                                                                                                                 | AAD15                                                                                                                                                                                                              |
| GO:0030490     | 0.00703327 | maturation of SSU-rRNA                                                                    | 7993_at                                                                                                                                                                                                                                                                                                                                                   | CLN2                                                                                                                                                                                                               |
| GO:0034470     | 2.03E-07   | ncRNA processing                                                                          | 7204_at                                                                                                                                                                                                                                                                                                                                                   | AMN1                                                                                                                                                                                                               |
| GO:0034622     | 0.03848755 | cellular macromolecular complex assembly                                                  | 3989_at;4358_at;4460_i_at;4899_at;5643_at;5655_n_at;6337_at;6453_at;6455_s_at;6459_at;6641_at;7777_at;7859_at;8251_at;9683_at                                                                                                                                                                                                                             | BI4;SPO16;SAE3;CLB6;RNR1;MEI4;SWIS;ENAS;ENA2;MCD1;PCL9;ECM23;MEI5;SFG1;YOX1                                                                                                                                        |
| GO:0034641     | 2.73E-11   | cellular nitrogen compound metabolic process                                              | 6459_at;7204_at;9203_at                                                                                                                                                                                                                                                                                                                                   | MCD1;AMN1;EGT2                                                                                                                                                                                                     |
| GO:0034645     | 0.01347037 | cellular macromolecule biosynthetic process                                               | 9683_at                                                                                                                                                                                                                                                                                                                                                   | YOX1                                                                                                                                                                                                               |
| GO:0034654     | 0.02713677 | nucleobase-containing compound biosynthetic process                                       | 4899_at;6641_at;7993_at;9150_at                                                                                                                                                                                                                                                                                                                           | CLB6;PCL9;CLN2;PCL1                                                                                                                                                                                                |
| GO:0034660     | 1.68E-07   | ncRNA metabolic process                                                                   | 4899_at;5177_at;6641_at;7993_at;9150_at                                                                                                                                                                                                                                                                                                                   | CLB6;RCK1;PCL9;CLN2;PCL1                                                                                                                                                                                           |
| GO:0042254     | 3.01E-07   | ribosome biogenesis                                                                       | 4899_at                                                                                                                                                                                                                                                                                                                                                   | CLB6                                                                                                                                                                                                               |
| GO:0042273     | 0.03401953 | ribosomal large subunit biogenesis                                                        | 6641_at                                                                                                                                                                                                                                                                                                                                                   | PCL9                                                                                                                                                                                                               |
| GO:0042274     | 0.00310669 | ribosomal small subunit biogenesis                                                        | 4460_i_at;6459_at;7859_at                                                                                                                                                                                                                                                                                                                                 | SAE3;MCD1;MEI5                                                                                                                                                                                                     |
| GO:0043170     | 3.27E-10   | macromolecule metabolic process                                                           | 6459_at                                                                                                                                                                                                                                                                                                                                                   | MCD1                                                                                                                                                                                                               |
| GO:0043933     | 0.02023891 | macromolecular complex subunit organization                                               | 4358_at;4460_l_at;4787_at;4796_at;5177_at;5609_at;5655_n_at;6337_at;7859_at;7993_at                                                                                                                                                                                                                                                                       | SPO16;SAE3;TOS2;BNS1;RCK1;DSE1;MEI4;SWIS;MEI5;CLN2                                                                                                                                                                 |
| GO:0044085     | 6.18E-08   | cellular component biogenesis                                                             | 4460_i_at;7859_at                                                                                                                                                                                                                                                                                                                                         | SAE3;MEI5                                                                                                                                                                                                          |
| GO:0044237     | 1.27E-10   | cellular metabolic process                                                                | 4899_at                                                                                                                                                                                                                                                                                                                                                   | CLB6                                                                                                                                                                                                               |
| GO:0044238     | 1.27E-11   | primary metabolic process                                                                 | 11301_i_at                                                                                                                                                                                                                                                                                                                                                | FLO1                                                                                                                                                                                                               |
| GO:0044249     | 0.00155379 | cellular biosynthetic process                                                             | 5609_at;7993_at                                                                                                                                                                                                                                                                                                                                           | DSE1;CLN2                                                                                                                                                                                                          |
| GO:0044260     | 5.49E-10   | cellular macromolecule metabolic process                                                  | 3989_at;4358_at;4460_i_at;5655_n_at;7859_at                                                                                                                                                                                                                                                                                                               | BI4;SPO16;SAE3;MEI4;MEI5                                                                                                                                                                                           |
| GO:0044271     | 0.02713677 | cellular nitrogen compound biosynthetic process                                           | 3989_at;4358_at;4460_i_at;4899_at;5643_at;5655_n_at;6337_at;6459_at;7859_at                                                                                                                                                                                                                                                                               | BI4;SPO16;SAE3;CLB6;RNR1;MEI4;SWIS;MCD1;MEI5                                                                                                                                                                       |
| GO:0044281     | 0.02980997 | small molecule metabolic process                                                          | 4899_at;5643_at                                                                                                                                                                                                                                                                                                                                           | CLB6;RNR1                                                                                                                                                                                                          |
| GO:0044699     | 7.75E-07   | single-organism process                                                                   | 10164_at;10576_at;10755_at;11079_at;11256_at;11301_i_at;3628_f_at;3934_at;3989_at;4358_at;4392_at;4460_i_at;4787_at;4796_at;4899_at;5177_at;5609_at;5643_at;5655_n_at;6337_at;6453_at;6455_s_at;6459_at;6641_at;7204_at;7546_at;7554_at;7777_at;7859_at;7907_at;7912_at;7981_at;7993_at;8251_at;8716_s_at;8922_at;9150_at;9185_at;9203_at;9683_at;9712_at | TOS4;PRY2;PIR1;PRY3;IMAS;FLO1;COS10;RTM1;BI4;SPO16;DSE2;SAE3;TOS2;BNS1;CLB6;RCK1;DSE1;RNR1;MEI4;SWIS;ENAS;ENA2;MCD1;PCL9;AMN1;OPT2;ARR3;ECM23;MEI5;SVS1;AIM44;GRE1;CLN2;SFG1;AAD15;SUN4;PCL1;TOS6;EGT2;YOX1;AI M33 |
| GO:0044763     | 1.61E-06   | single-organism cellular process                                                          | 4358_at                                                                                                                                                                                                                                                                                                                                                   | SPO16                                                                                                                                                                                                              |
| GO:0044765     | 0.04958734 | single-organism transport                                                                 | 8922_at                                                                                                                                                                                                                                                                                                                                                   | SUN4                                                                                                                                                                                                               |
| GO:0046483     | 3.57E-11   | heterocycle metabolic process                                                             | 6337_at;6641_at;9683_at                                                                                                                                                                                                                                                                                                                                   | SWIS;PCL9;YOX1                                                                                                                                                                                                     |
| GO:0050789     | 0.01919819 | regulation of biological process                                                          | 6337_at;6459_at;7204_at;9203_at                                                                                                                                                                                                                                                                                                                           | SWIS;MCD1;AMN1;EGT2                                                                                                                                                                                                |
| GO:0050794     | 0.01919819 | regulation of cellular process                                                            | 3989_at                                                                                                                                                                                                                                                                                                                                                   | BI4                                                                                                                                                                                                                |
| GO:0051179     | 0.00204782 | localization                                                                              | 3989_at                                                                                                                                                                                                                                                                                                                                                   | BI4                                                                                                                                                                                                                |
| GO:0051234     | 0.00270541 | establishment of localization                                                             | 3989_at                                                                                                                                                                                                                                                                                                                                                   | BI4                                                                                                                                                                                                                |
| GO:0065003     | 0.03848755 | macromolecular complex assembly                                                           | 5609_at;7993_at                                                                                                                                                                                                                                                                                                                                           | DSE1;CLN2                                                                                                                                                                                                          |
| GO:0065007     | 0.01517286 | biological regulation                                                                     | 11256_at                                                                                                                                                                                                                                                                                                                                                  | IMAS                                                                                                                                                                                                               |
| GO:0071702     | 0.03848755 | organic substance transport                                                               | 3989_at                                                                                                                                                                                                                                                                                                                                                   | BI4                                                                                                                                                                                                                |
| GO:0071704     | 3.55E-13   | organic substance metabolic process                                                       | 11256_at                                                                                                                                                                                                                                                                                                                                                  | IMAS                                                                                                                                                                                                               |
| GO:0071840     | 1.91E-09   | cellular component organization or biogenesis                                             | 7993_at                                                                                                                                                                                                                                                                                                                                                   | CLN2                                                                                                                                                                                                               |
| GO:0090304     | 2.40E-09   | nucleic acid metabolic process                                                            | 4460_i_at;7859_at                                                                                                                                                                                                                                                                                                                                         | SAE3;MEI5                                                                                                                                                                                                          |
| GO:0090305     | 0.02303983 | nucleic acid phosphodiester bond hydrolysis                                               | 4460_i_at;6459_at;7859_at                                                                                                                                                                                                                                                                                                                                 | SAE3;MCD1;MEI5                                                                                                                                                                                                     |
| GO:0090501     | 0.04369765 | RNA phosphodiester bond hydrolysis                                                        | 3989_at                                                                                                                                                                                                                                                                                                                                                   | BI4                                                                                                                                                                                                                |
| GO:1901360     | 3.57E-11   | organic cyclic compound metabolic process                                                 | 11256_at                                                                                                                                                                                                                                                                                                                                                  | IMAS                                                                                                                                                                                                               |
| GO:1901362     | 0.02713677 | organic cyclic compound biosynthetic process                                              | 6337_at;6641_at;9683_at                                                                                                                                                                                                                                                                                                                                   | SWIS;PCL9;YOX1                                                                                                                                                                                                     |
| GO:1901576     | 0.0017769  | organic substance biosynthetic process                                                    | 6453_at;6455_s_at                                                                                                                                                                                                                                                                                                                                         | ENAS;ENA2                                                                                                                                                                                                          |

**Supplementary Table S6** - Key components in the first segment of diel growth state transition of diatom *Thalassiosira pseudonana*

| EntrezGeneID | ProteinID | array_probes                                    | GeneSymbol       | Genome     | Description                                                                  |
|--------------|-----------|-------------------------------------------------|------------------|------------|------------------------------------------------------------------------------|
| 7445065      | 869       | chr1_17784_-,chr1_17987_-,chr1_18127_-          |                  | chr_1      | PT repeat                                                                    |
| 7445024      | 30871     | chr1_1019845_-,chr1_1019985_-,chr1_1020188_-    |                  | chr_1      | Ham1-like protein                                                            |
| 7445655      | 20731     | chr1_1031009_+,chr1_1030865_-,chr1_1030725_+    |                  | chr_1      | mitochondrial carrier protein                                                |
| 7445125      | 268027    | chr1_1510056_-,chr1_1510196_-,chr1_1510336_-    |                  | chr_1      | Protein of unknown function Met10                                            |
| 7451494      | 39143     | chr1_1636840_+,chr1_1636700_-,chr1_1636560_+    | ANT1             | chr_1      | (ANT1) adenine nucleotide translocator; ATP/ADP translocase                  |
| 7445530      | 20952     | chr1_2174127_-,chr1_2174267_-,chr1_2174407_-    |                  | chr_1      | MscS Mechanosensitive ion channel                                            |
| 7449024      | 14293     | chr1_2240238_-,chr1_2240378_-,chr1_2240518_-    |                  | chr_1      | hypothetical protein                                                         |
| 7445006      | 1855      | chr1_2589121_+,chr1_2588981_+,chr1_2588841_+    |                  | chr_1      | Auxin Efflux Carrier                                                         |
| 7447602      | 2024      | chr1_2976676_-,chr1_2976816_-,chr1_2976956_-    |                  | chr_1      | Protein kinase                                                               |
| 7445882      | 269503    | chr10_504420_+,chr10_504260_-,chr10_504120_+    | Tp_HSF_1e        | chr_10     | (Tp_HSF_1e) regulator [Rayko]                                                |
| 7446892      | 26366     | chr10_794586_-,chr10_794726_-,chr10_794946_-    |                  | chr_10     | oxoglutarate/malate translocator                                             |
| 7450776      | 36339     | chr10_1008761_-,chr10_1008901_-,chr10_1009065_- | ITS1             | chr_10     | (ITS1) isoleucine-trna synthetase                                            |
| 7450781      | 24261     | chr10_1056514_-,chr10_1056654_-,chr10_1056794_- |                  | chr_10     | hypothetical protein                                                         |
| 7447991      | 36958     | chr12_753406_-,chr12_753546_-                   |                  | chr_12     | Protein kinase                                                               |
| 7447824      | 26022     | chr13_540238_-,chr13_540378_-,chr13_540518_-    |                  | chr_13     | Protein of unknown function UPF0108                                          |
| 7451616      | 24757     | chr14_61719_+,chr14_61579_+,chr14_61439_+       |                  | chr_14     | hypothetical protein                                                         |
| 7452706      | 24878     | chr14_641679_-,chr14_641819_-,chr14_641959_-    |                  | chr_14     | DNA-binding SAP                                                              |
| 7444306      | 24977     | chr15_243035_-,chr15_243175_-,chr15_243315_-    |                  | chr_15     | hypothetical protein                                                         |
| 7441999      | 10143     | chr15_385140_-,chr15_385280_-,chr15_385420_-    |                  | chr_15     | Endoplasmic reticulum targeting sequence                                     |
| 7450265      | 30154     | chr15_611196_+,chr15_611056_+,chr15_610916_+    | Rpl27            | chr_15     | (Rpl27) 60S subunit ribosomal protein L27                                    |
| 7450288      | 10249     | chr15_721994_+,chr15_721854_+,chr15_721714_+    |                  | chr_15     | hypothetical protein                                                         |
| 7443996      | 264350    | chr15_913295_-,chr15_913435_-,chr15_913575_-    | Tp_CCHH1_Myb2R10 | chr_15     | (Tp_CCHH1_Myb2R10) regulator [Rayko]                                         |
| 7450326      | 10542     | chr17_15357_+,chr17_15217_+,chr17_15077_+       |                  | chr_17     | hypothetical protein                                                         |
| 7453132      | 269900    | chr17_193040_-,chr17_193180_-,chr17_193320_-    | glfF             | chr_17     | (glfF) glutamate synthase                                                    |
| 7444188      | 10608     | chr17_215819_-,chr17_215959_-,chr17_216099_-    |                  | chr_17     | hypothetical protein                                                         |
| 7453139      | 10612     | chr17_224760_+,chr17_224620_+,chr17_224480_+    |                  | chr_17     | Rhodanese-like                                                               |
| 7446272      | 814       | chr19a_157141_-,chr19a_157406_-,chr19a_157618_- |                  | chr_19a_19 | hypothetical protein                                                         |
| 7449909      | 25472     | chr19a_294084_+,chr19a_293933_+,chr19a_293793_+ |                  | chr_19a_19 | hypothetical protein                                                         |
| 7449916      | 25478     | chr19a_323687_-,chr19a_323827_-,chr19a_323967_- |                  | chr_19a_19 | hypothetical protein                                                         |
| 7444320      | 11209     | chr19a_451791_-,chr19a_451931_-,chr19a_452071_- |                  | chr_19a_19 | hypothetical protein                                                         |
| 7444329      | 25491     | chr19a_500256_+,chr19a_500116_+,chr19a_499976_+ |                  | chr_19a_19 | hypothetical protein                                                         |
| 7444342      | 38272     | chr19a_561728_-,chr19a_561868_-,chr19a_562008_- |                  | chr_19a_19 | oxidase                                                                      |
| 7451827      | 38360     | chr19c_70413_+,chr19c_70231_+,chr19c_70091_+    |                  | chr_19c_29 | Peptidase C1A, papain                                                        |
| 7444403      | 11367     | chr19c_175590_+,chr19c_175450_+,chr19c_175310_+ |                  | chr_19c_29 | hypothetical protein                                                         |
| 7448434      | 2159      | chr2_323964_+,chr2_323824_-,chr2_323684_+       |                  | chr_2      | hypothetical protein                                                         |
| 7444630      | 2435      | chr2_1002284_-,chr2_1002424_-,chr2_1002564_-    |                  | chr_2      | hypothetical protein                                                         |
| 7444631      | 39516     | chr2_1004722_-,chr2_1004862_-,chr2_1005002_-    |                  | chr_2      | Radical SAM                                                                  |
| 7450382      | 21311     | chr2_1171059_-,chr2_1171199_-,chr2_1171339_-    |                  | chr_2      | Endoplasmic reticulum targeting sequence                                     |
| 7443052      | 21363     | chr2_1450401_-,chr2_1450541_-,chr2_1450681_-    |                  | chr_2      | hypothetical protein                                                         |
| 7450482      | 261601    | chr2_2505055_+,chr2_2504915_+,chr2_2504775_+    |                  | chr_2      | Fibronectin, type III subdomain                                              |
| 7452128      | 14979     | chr2_2571662_-,chr2_2571802_-,chr2_2571942_-    |                  | chr_2      | Aminotransferase, class V                                                    |
| 7442414      | 261613    | chr2_2609176_-,chr2_2614871_+,chr2_2609316_-    |                  | chr_2      | Leucyl/phenylalanyl-tRNA--protein transferase                                |
| 7442416      | 3047      | chr2_2623747_+,chr2_2623607_+,chr2_2623467_+    |                  | chr_2      | Endonuclease/exonuclease/phosphatase                                         |
| 7447822      | 19289     | chr20_144634_+,chr20_144494_+,chr20_144354_+    | Tp_CBF/NF3       | chr_20     | (Tp_CBF/NF3) regulator [Rayko]                                               |
| 7443898      | 11824     | chr22_549408_-,chr22_549548_-,chr22_549688_-    |                  | chr_22     | Glucose inhibited division protein                                           |
| 7444020      | 32790     | chr3_405033_+,chr3_404893_+                     |                  | chr_3      | RNA-binding region RNP-1 (RNA recognition motif)                             |
| 7449539      | 261885    | chr3_1694422_-,chr3_1694562_-,chr3_1694751_-    |                  | chr_3      | rna-binding protein                                                          |
| 7445385      | 3895      | chr3_2061742_+,chr3_2061602_+,chr3_2061462_+    |                  | chr_3      | hypothetical protein                                                         |
| 7452775      | 4038      | chr3_2408537_+,chr3_2408397_+,chr3_2408257_+    |                  | chr_3      | C2 calcium/lipid-binding region, CaLB                                        |
| 7446730      | 4086      | chr4_130741_+,chr4_130601_+,chr4_130144_+       |                  | chr_4      | hypothetical protein                                                         |
| 7447505      | 33312     | chr4_740514_+,chr4_740374_+,chr4_740234_+       |                  | chr_4      | NnrU                                                                         |
| 7453352      | 27850     | chr4_940570_-,chr4_940710_-,chr4_940850_-       | PGAM2            | chr_4      | (PGAM2) phosphoglycerate mutase                                              |
| 7453353      | 4408      | chr4_942944_+,chr4_942804_+,chr4_942664_+       |                  | chr_4      | hypothetical protein                                                         |
| 7446120      | 22311     | chr4_1346210_+,chr4_1346070_+,chr4_1345930_+    |                  | chr_4      | Chaperonin Cpn60                                                             |
| 7446147      | 40393     | chr4_1498540_-,chr4_1498680_-,chr4_1498820_-    | PYK1             | chr_4      | (PYK1) pyruvate kinase                                                       |
| 7446148      | 22345     | chr4_1502053_+,chr4_1501913_+,chr4_1501773_+    | PYK2             | chr_4      | (PYK2) pyruvate kinase                                                       |
| 7451969      | 22430     | chr4_1946324_-,chr4_1946464_-,chr4_1946604_-    |                  | chr_4      | SOUL heme-binding protein                                                    |
| 7447253      | 22535     | chr5_151541_+,chr5_151401_+,chr5_151261_+       | RS11             | chr_5      | (RS11) RS11, ribosomal protein 11 40S small ribosomal subunit                |
| 7449678      | 22592     | chr5_402473_+,chr5_402333_+,chr5_402128_+       |                  | chr_5      | CBS                                                                          |
| 7449701      | 28239     | chr5_488233_-,chr5_488373_-,chr5_488513_-       |                  | chr_5      | triosephosphate isomerase/glyceraldehyde-3-phosphate dehydrogenase precursor |
| 7446452      | 22683     | chr5_882222_-,chr5_882362_-,chr5_882502_-       |                  | chr_5      | PT repeat                                                                    |
| 7450035      | 22706     | chr5_1010654_-,chr5_1010794_-,chr5_1010934_-    |                  | chr_5      | PPR repeat                                                                   |
| 7448370      | 19623     | chr6_152776_-,chr6_152916_-                     |                  | chr_6      | RNA-binding region RNP-1 (RNA recognition motif)                             |
| 7443600      | 6123      | chr6_764014_-,chr6_764154_-,chr6_764294_-       |                  | chr_6      | Ankyrin                                                                      |
| 7443620      | 35041     | chr6_864671_+,chr6_864531_+,chr6_864391_+       |                  | chr_6      | KH                                                                           |
| 7442377      | 34730     | chr6_1127382_-,chr6_1127522_-,chr6_1127698_-    |                  | chr_6      | Glucose/ribitol dehydrogenase                                                |
| 7442382      | 34826     | chr6_1166008_+,chr6_1165868_+                   |                  | chr_6      | hypothetical protein                                                         |
| 7453272      | 269141    | chr6_1310132_-,chr6_1310272_-,chr6_1310412_-    |                  | chr_6      | TPR repeat                                                                   |
| 7453294      | 6370      | chr6_1416239_+,chr6_1416099_+,chr6_1415959_+    |                  | chr_6      | tRNA/rRNA methyltransferase (SpoU)                                           |
| 7446337      | 23295     | chr6_1811644_+,chr6_1811504_+,chr6_1811364_+    |                  | chr_6      | Aromatic amino acid permease                                                 |
| 7446347      | 23306     | chr6_1878265_+,chr6_1878125_+,chr6_1877985_+    |                  | chr_6      | hypothetical protein                                                         |
| 7446170      | 23347     | chr7_234829_-,chr7_234969_-,chr7_235109_-       |                  | chr_7      | hypothetical protein                                                         |
| 7449192      | 263129    | chr7_675907_+,chr7_675767_+,chr7_675627_+       |                  | chr_7      |                                                                              |
| 7449215      | 23441     | chr7_785128_-,chr7_785268_-,chr7_785408_-       |                  | chr_7      | Patatin                                                                      |
| 7443420      | 7338      | chr7_1976069_+,chr7_1975929_+,chr7_1975789_+    |                  | chr_7      | hypothetical protein                                                         |
| 7443429      | 23653     | chr8_43300_+,chr8_43160_+,chr8_43020_+          |                  | chr_8      | Cyclin, N-terminal                                                           |
| 7450154      | 7539      | chr8_484955_-,chr8_485095_-,chr8_485235_-       |                  | chr_8      | hypothetical protein                                                         |
| 7452865      | 29217     | chr8_935548_-,chr8_935688_-                     |                  | chr_8      | Ribosomal protein L30e                                                       |
| 7444929      | 23847     | chr8_1027959_+,chr8_1027819_+,chr8_1027679_+    |                  | chr_8      | TrA domain protein                                                           |
| 7444977      | 23897     | chr9_33068_+,chr9_32928_+,chr9_32788_+          |                  | chr_9      | hypothetical protein                                                         |
| 7443502      | 7924      | chr9_271552_-,chr9_271692_-,chr9_271832_-       |                  | chr_9      | hypothetical protein                                                         |
| 7451005      | 18076     | chr9_1112400_+,chr9_1112222_+,chr9_1112082_+    |                  | chr_9      | Adenylate kinase                                                             |
